# Supplementary material for: The Economic Impact of Innovative Therapies for Rare Diseases on Healthcare Providers and the Healthcare System in Germany – The Example of Spinal Muscular Atrophy
Source: Research Square preprint supplement (doi:10.21203/rs.3.rs-93955/v1), 2020-10-21
Supplement: Supplementary file 1 [file 8cca31886a0e813e994a5dfb.docx]

|  |  | **Age** | | **Nusinersen** | | **Onasemnogen Abeparvovec** | |
| --- | --- | --- | --- | --- | --- | --- | --- |
|  |  | **≤ 18 years** | **> 18 years** | **Pre** | **Post** | **Pre** | **Post** |
| **Federal State** | **n** | **n (%)** | **n (%)** | **n** | **n** | **n** | **n** |
| Baden-Württemberg | 131 | 102 (77.9 %) | 29 (22.1 %) | 110 | 96 | 7 | 20 |
| Bayern | 221 | 95 (43 %) | 126 (57 %) | 146 | 136 | 0 | 9 |
| Berlin | 41 | 41 (100 %) | 0 (0 %) | 35 | 35 | 1 | 7 |
| Brandenburg | 10 | 10 (100 %) | 0 (0 %) | 7 | 9 | 0 | 2 |
| Bremen | 4 | 4 (100 %) | 0 (0 %) | 3 | 4 | 0 | 1 |
| Hamburg | 84 | 82 (97.6 %) | 2 (2.4 %) | 73 | 15 | 3 | 13 |
| Hessen | 97 | 50 (51.5 %) | 47 (48.5 %) | 80 | 74 | 1 | 5 |
| Mecklenburg-Vorpommern | 2 | 2 (100 %) | 0 (0 %) | 2 | 2 | 0 | 0 |
| Niedersachsen | 141 | 80 (56.7 %) | 61 (43.3 %) | 125 | 123 | 0 | 5 |
| Nordrhein-Westfalen | 232 | 129 (55.6 %) | 103 (44.4 %) | 204 | 170 | 4 | 15 |
| Rheinland-Pfalz | 1 | 1 (100 %) | 0 (0 %) | 1 | 1 | 0 | 0 |
| Saarland | 7 | 5 (71.4 %) | 2 (28.6 %) | 7 | 4 | 0 | 2 |
| Sachsen | 83 | 20 (24.1 %) | 63 (75.9 %) | 43 | 54 | 1 | 5 |
| Sachsen-Anhalt | 17 | 7 (41.2 %) | 10 (58.8 %) | 13 | 15 | 0 | 1 |
| Schleswig-Holstein | 5 | 0 (0 %) | 5 (100 %) | 1 | 3 | 0 | 0 |
| Thüringen | 21 | 18 (85.7 %) | 3 (14.3 %) | 16 | 20 | 0 | 7 |
| **Σ** | **1.097** | **646** | **451** | **867** | **761** | **17** | **92** |

Supplementary Table 1: Demographic data on SMA in German Federal States

Pre = therapy in the last 12 months, post = expected therapy in the next 12 months
